# Supplementary material for: CuO nanoleaf and β-cyclodextrin functionalized reduced graphene oxide: a highly selective and sensitive electrochemical sensor for the simultaneous detection of 2-chlorophenol and 2, 4-dichlorophenol
Source: Royal Society of Chemistry journal article supplement (doi:10.1039/d2ay01887j), 2022-12-23
Supplement: d2ay01887j1.pdf [file d2ay01887j1.pdf]

### Electronic Supplementary Information

#### CuO nanoleaves and $\beta$ -cyclodextrin functionalized reduced graphene oxide: A highly selective and sensitive electrochemical sensor for the simultaneous detection of 2-chlorophenol and 2, 4-dichlorophenol

Umme Solaem Akond<sup>a</sup>, Abhinandan Mahanta<sup>a</sup> and Sk. Jasimuddin<sup>a\*</sup>

Department of Chemistry, Assam University, Silchar, Assam-788011, India

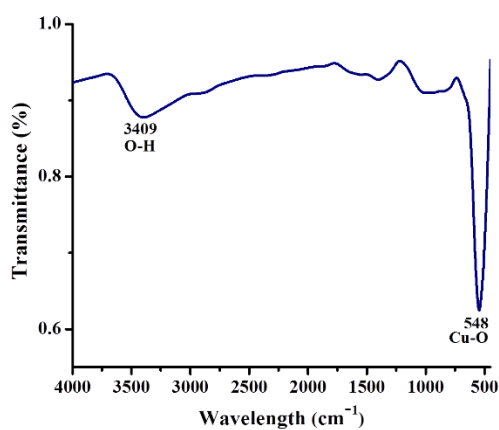

Fig. S1 FTIR spectra of CuO nanoleaves

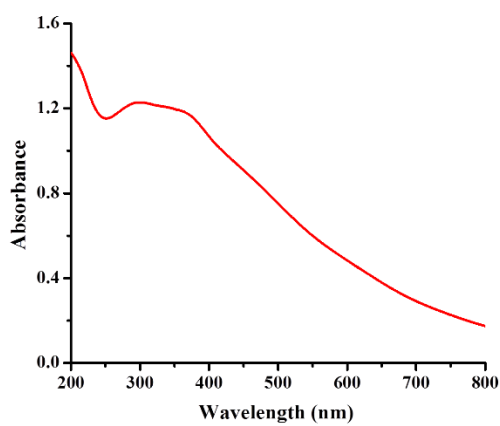

Fig. S2 UV-visible spectra of CuO nanoleaves in aqueous solution

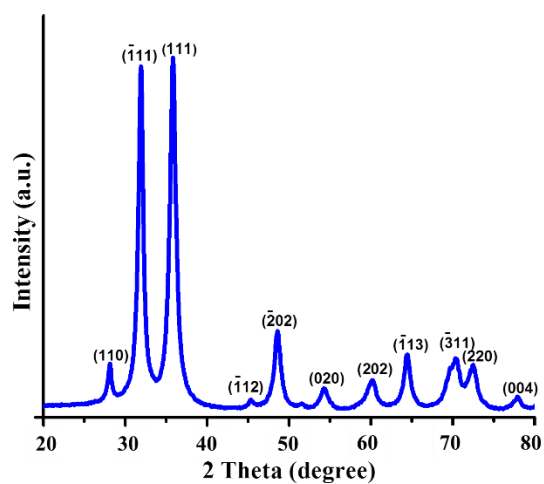

**Fig. S3** X-ray diffraction pattern of CuO NPs.

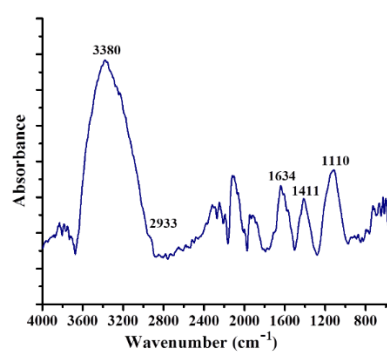

**Fig. S4a** ATR-FTIR of rGO-GCE

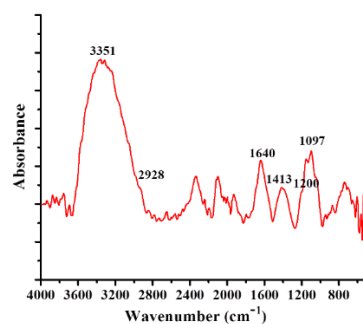

**Fig. S4b** ATR-FTIR of β-CD-rGO-GCE

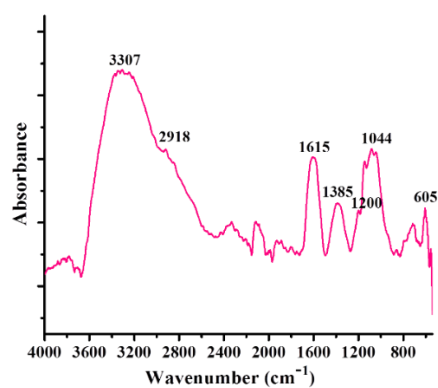

**Fig. S4c** ATR-FTIR of CuO-β-CD-rGO-GCE

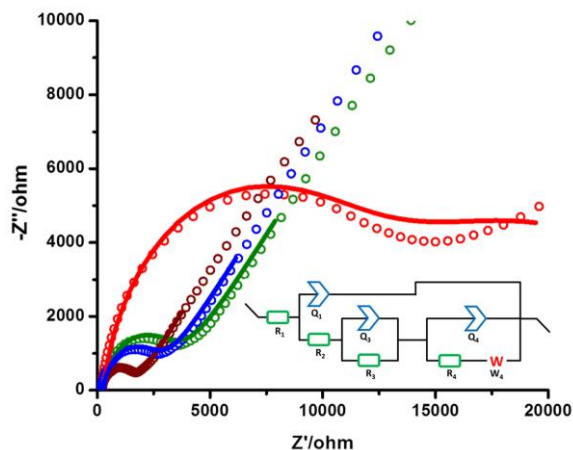

**Fig. S5** Overlaid Nyquist plots ( $-Z''$  versus  $Z'$ ,  $E_{ac} = 10$  mV, frequency range: 0.01-100000 Hz) of 0.5 mM  $K_4[Fe(CN)_6]$  in 0.1 M PBS (pH 7.0) at GCE (green curve), rGO-GCE (brown curve),  $\beta$ -CD-rGO-GCE (red curve) and CuO NLS- $\beta$ -CD-rGO-GCE (blue curve). Data points are experimental while the solid lines are the fitted lines (Inset: Randles equivalent circuit used to fit the EIS data)

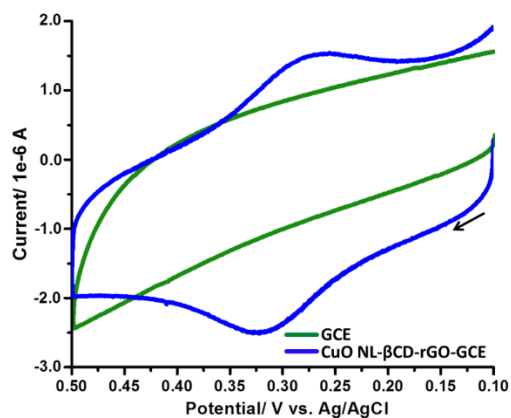

**Fig. S6** Cyclic voltammograms obtained at bare and CuO NLS- $\beta$ -CD-rGO modified GCE in 0.1 m PBS (pH 7.0).

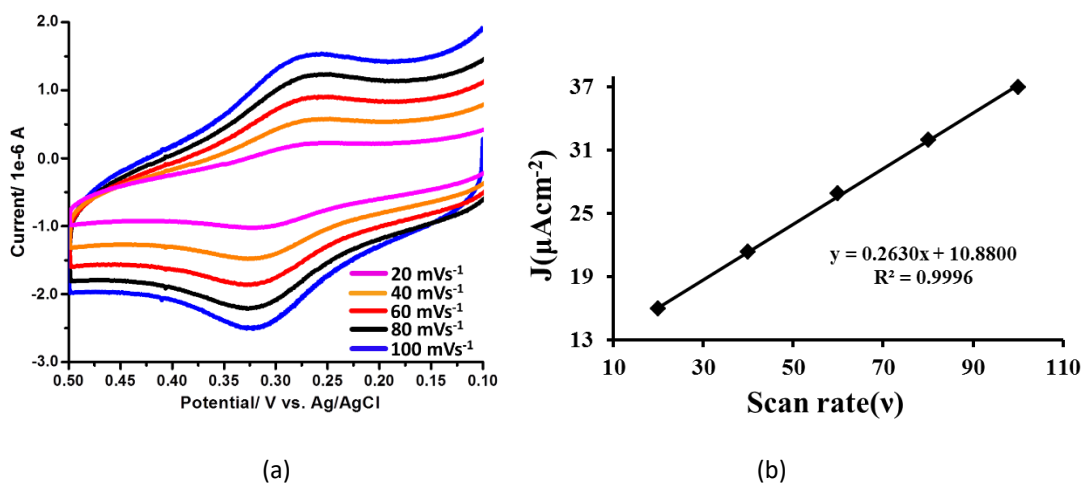

(a)

(b)

**Fig. S7** Overlaid cyclic voltammograms obtained with increasing scan rate at CuO NLS- $\beta$ -CD-rGO-GCE in 0.1 M PBS (pH 7.0)(a); A plot of current density ( $J$ ) versus scan rate ( $v$ ) (b).

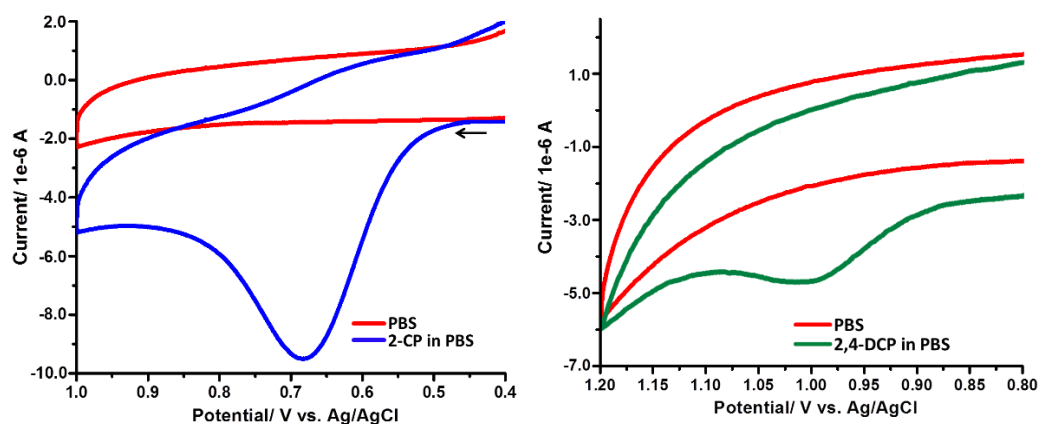

**Fig. S8** Overlaid CVs for 0.1 M PBS (red curve) and 10  $\mu$ M 2-CP in 0.1 M PBS (pH 6.0) (blue curve) (a); Overlaid CVs for 0.1 M PBS (red curve) and 10  $\mu$ M 2,4-DCP in 0.1 M PBS (pH 6.0) (green curve) (b).

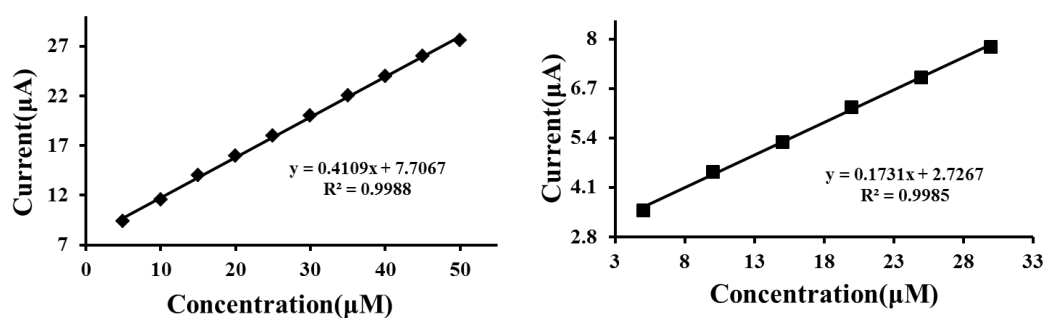

**Fig. S9** A plot of current as a function of concentration of 2-CP with linear trend line ( $R^2 > 0.99$ ) (a); A plot of current as a function of concentration of 2,4-DCP with linear trend line ( $R^2 > 0.99$ )(b).

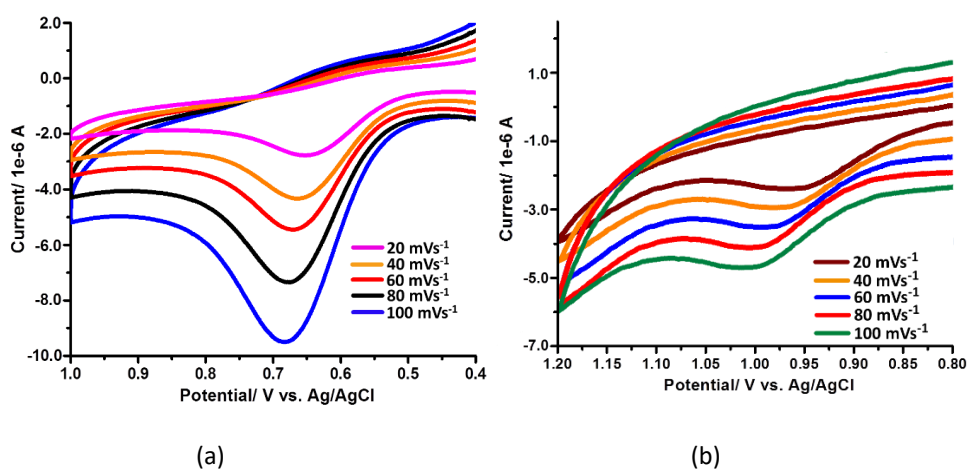

**Fig. S10** CVs of 10  $\mu$ M 2-CP (a) and 10  $\mu$ M 2,4-DCP (b) in 0.1 M PBS (pH 6.0) at different scan rate (20-100  $\text{mVs}^{-1}$ ) using CuO NLS- $\beta$ -CD-rGO-GCE.

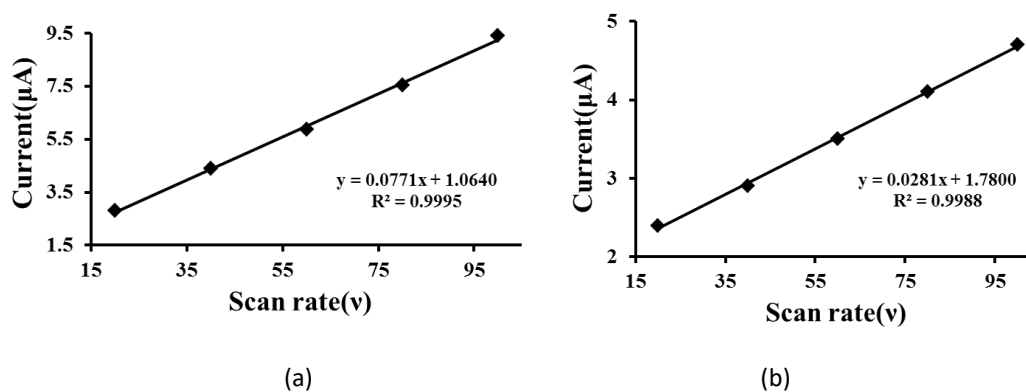

Fig. S11 Plot of oxidation peak current of 10  $\mu\text{M}$  2-CP (a) and 10  $\mu\text{M}$  2,4-DCP (b) versus scan rate.

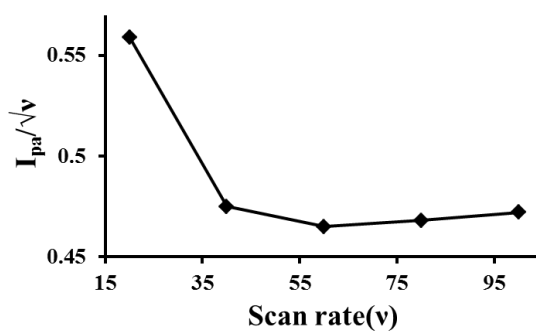

Fig. S12 A plot of scan rate –normalized current versus scan rate

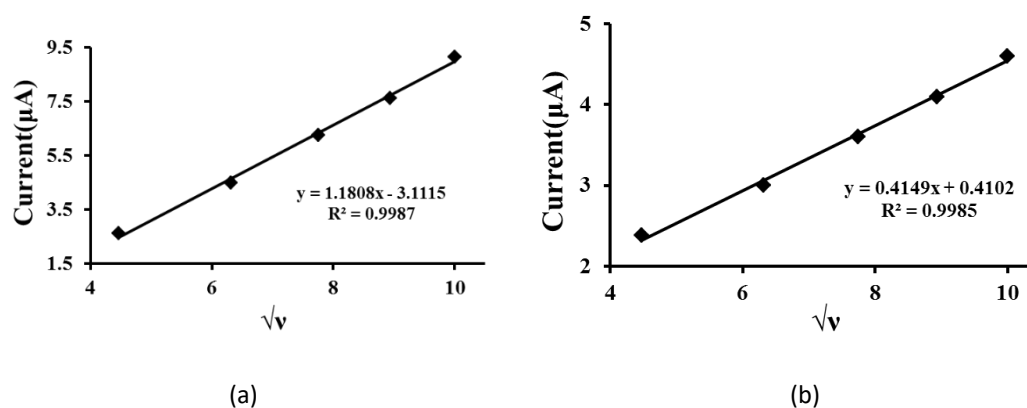

Fig. S13 Plot of oxidation peak current of 10  $\mu\text{M}$  2-CP (a) and 10  $\mu\text{M}$  2,4-DCP (b) versus square root of scan rate.

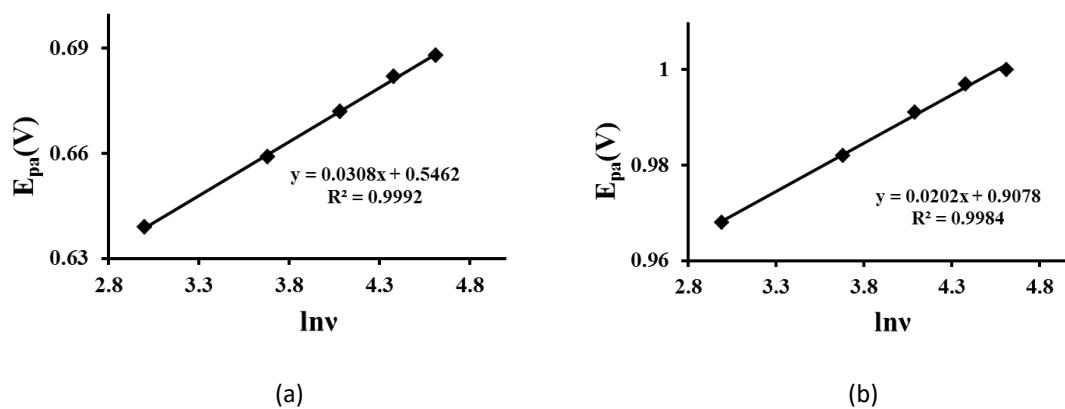

**Fig. S14** Plot of  $E_{pa}$  versus  $\lnv$  for 2-CP (a) and 2,4-DCP (b)

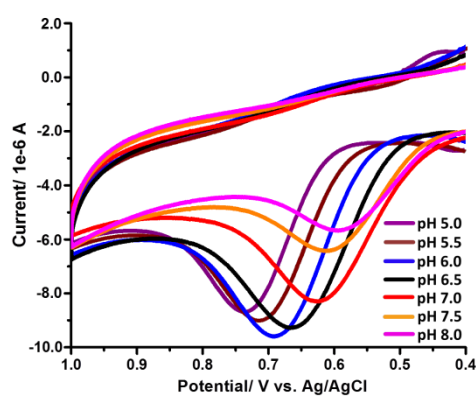

**Fig. S15** Overlaid CVs of 10  $\mu\text{M}$  2-CP at different pH using CuO NLS- $\beta$ -CD-rGO-GCE.

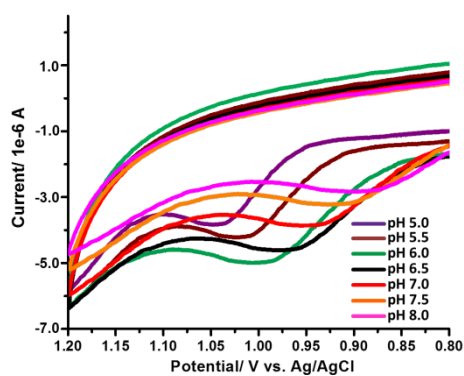

**Fig. S16** Overlaid CVs of 10  $\mu\text{M}$  2,4-DCP at different pH using CuO NLS- $\beta$ -CD-rGO-GCE.

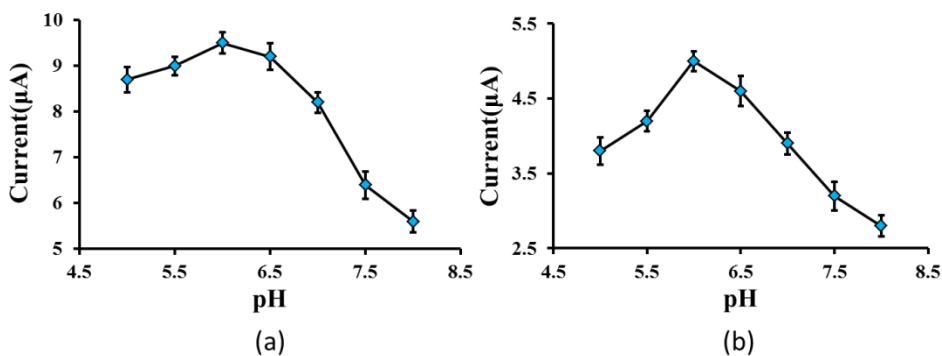

**Fig. S17** Plot of oxidation peak current of 10  $\mu\text{M}$  2-CP (a) and 2,4-DCP (b) versus pH at CuO NLS- $\beta$ -CD-rGO-GCE in 0.1 M PBS.

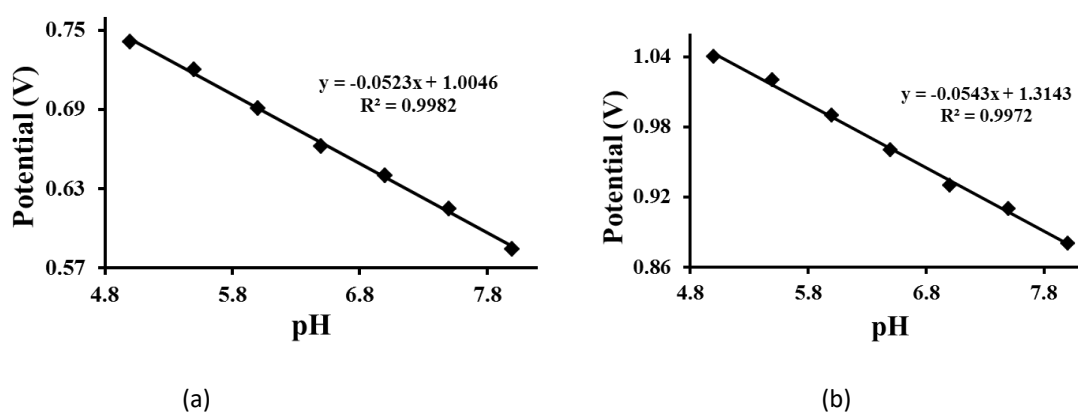

**Fig. S18** Plot of oxidation peak potential of 10  $\mu\text{M}$  2-CP versus pH (a); Plot of oxidation peak potential of 10  $\mu\text{M}$  2,4-DCP versus pH (b).

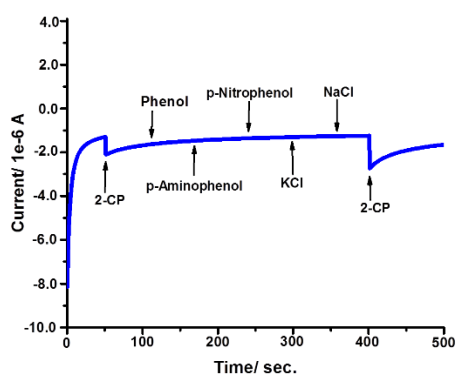

**Fig. S19** Amperometric response at CuO NLS- $\beta$ -CD-rGO-GCE with an applied potential of 0.68 V on subsequent addition of 10  $\mu\text{M}$  2-CP, 50  $\mu\text{M}$  phenol, 50  $\mu\text{M}$  p-aminophenol, 50  $\mu\text{M}$  p-nitrophenol, 50  $\mu\text{M}$  KCl, 50  $\mu\text{M}$  NaCl and 10  $\mu\text{M}$  2-CP under stirring condition in 0.1 M PBS (pH 6.0).

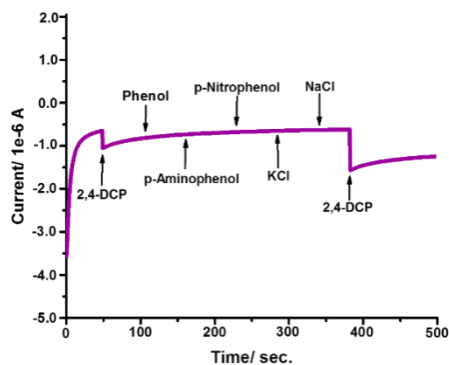

**Fig. S20** Amperometric response at CuO NLS-β-CD-rGO-GCE with an applied potential of 1.0 V on subsequent addition of 10 μM 2,4-DCP, 50 μM phenol, 50 μM p-aminophenol, 50 μM p-nitrophenol, 50 μM KCl, 50 μM NaCl and 10 μM 2,4-DCP under stirring condition in 0.1 M PBS (pH 6.0).

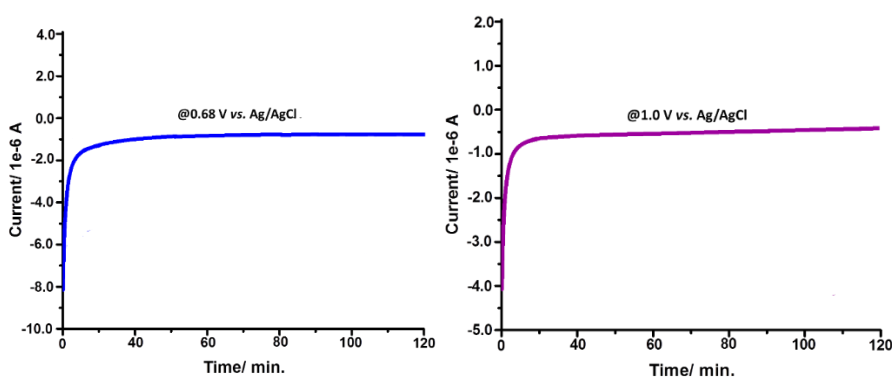

**Fig. S21** Chronoamperogram obtained by using CuO NLS-β-CD-rGO-GCE at an applied potential 0.68 V and 1.0 V in the presence of 10 μM 2-CP (a) and 10 μM 2,4-DCP (b), respectively in 0.1 m PBS (pH 6.0).

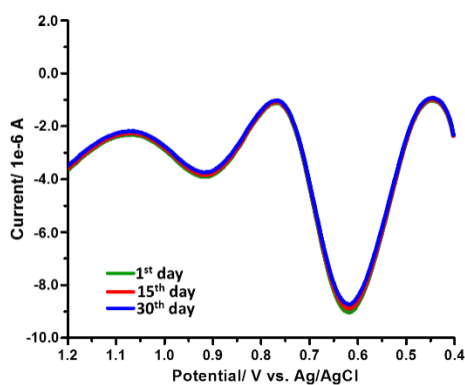

**Fig. S22** Overlaid DPVs of a mixed solution of 5 μM 2-CP and 5 μM 2,4-DCP in 0.1 M PBS (pH 6.0) obtained by using the CuO NLS-β-CD-rGO-GCE (DPVs were taken fifteen days interval and the electrode was kept by covering a Teflon cap when not in use).



**Table S1** Simultaneously analysis of 2-CP and 2,4-DCP in spiked water sample

| River water <sup>a</sup> | Spiked ( $\mu\text{M}$ ) | Found( $\mu\text{M}$ ) | RSD (%)<br>(n = 5) | Recovery (%) |
|--------------------------|--------------------------|------------------------|--------------------|--------------|
| 2-CP                     | 0                        | Not detected           | –                  | –            |
|                          | 1.5                      | 1.48                   | 1.01               | 98.67        |
|                          | 2                        | 2.03                   | 1.03               | 101.50       |
| 2,4-DCP                  | 0                        | Not detected           | –                  | –            |
|                          | 1.5                      | 1.43                   | 0.99               | 95           |
|                          | 2                        | 1.96                   | 1.10               | 98           |

<sup>a</sup> Obtained from The Brahmaputra River
